# Supplementary material for: Assessing the responses of Sphagnum micro-eukaryotes to climate changes using high throughput sequencing
Source: PeerJ. 2020 Sep 18;8:e9821. doi: 10.7717/peerj.9821 (PMC7505061; doi:10.7717/peerj.9821)
Supplement: Supplemental Information 1 — “WTD_Treatment” indicates water table treatment (DRY, CON –control, WET). “Warming” indicates warming treatment: OTC –warmed treatment with Open Top Chamber, ambient –treatment with ambient temperature. [file peerj-08-9821-s001.xlsx]

## Sheet: Environmental_variables
Supplemental Data S1 Shows environmental variables in experimental plots in field manipulative experiment in a Polish peatland. “WTD_Treatment” indicates water table treatment (DRY, CON – control, WET). “Warming” indicates warming treatment: OTC – warmed treatment with Open Top Chamber, ambient – treatment with ambient temperature.
	Plot	Season	WTD_Treatment	Warming	WTD	GDD
2M	2	May	DRY	OTC	14.4	105.2
3M	3	May	WET	ambient	5.7	78
4M	4	May	CON	OTC	7.6	101.4
5M	5	May	DRY	ambient	13.3	84.2
7M	7	May	CON	OTC	7.8	95.2
8M	8	May	CON	ambient	11.3	73.9
10M	10	May	WET	ambient	12	72.6
12M	12	May	CON	ambient	11.5	74.5
13M	13	May	DRY	ambient	19.5	77.9
14M	14	May	WET	OTC	8.3	98.4
16M	16	May	WET	OTC	8.5	99.1
19M	19	May	WET	OTC	9.5	94.2
22M	22	May	DRY	ambient	18.5	73.7
23M	23	May	DRY	OTC	13.3	110.5
24M	24	May	CON	OTC	7.7	102.9
25M	25	May	WET	ambient	6.5	74.1
26M	26	May	DRY	OTC	11.4	103
32M	32	May	CON	ambient	8.6	73.7
2A	2	Aug	DRY	OTC	45.6	861.9
3A	3	Aug	WET	ambient	36.9	746.5
4A	4	Aug	CON	OTC	38.8	858.8
5A	5	Aug	DRY	ambient	44.5	770.9
7A	7	Aug	CON	OTC	39	816.1
8A	8	Aug	CON	ambient	42.5	725
10A	10	Aug	WET	ambient	43.2	724.7
12A	12	Aug	CON	ambient	42.7	705.9
13A	13	Aug	DRY	ambient	50.7	756.7
14A	14	Aug	WET	OTC	39.5	844.1
16A	16	Aug	WET	OTC	39.7	830.8
19A	19	Aug	WET	OTC	40.7	826.4
22A	22	Aug	DRY	ambient	49.7	725.1
23A	23	Aug	DRY	OTC	44.5	867.7
24A	24	Aug	CON	OTC	38.9	857.8
25A	25	Aug	WET	ambient	37.7	716.2
26A	26	Aug	DRY	OTC	42.6	856.2
32A	32	Aug	CON	ambient	39.8	719.4
2N	2	Nov	DRY	OTC	24.5	621.3
3N	3	Nov	WET	ambient	15.8	552.5
4N	4	Nov	CON	OTC	17.7	625.1
5N	5	Nov	DRY	ambient	23.4	573.1
7N	7	Nov	CON	OTC	17.9	589
8N	8	Nov	CON	ambient	21.4	541.4
10N	10	Nov	WET	ambient	22.1	542.7
12N	12	Nov	CON	ambient	21.6	556
13N	13	Nov	DRY	ambient	29.6	565.2
14N	14	Nov	WET	OTC	18.4	619.6
16N	16	Nov	WET	OTC	18.6	608.3
19N	19	Nov	WET	OTC	19.6	607.2
22N	22	Nov	DRY	ambient	28.6	544.7
23N	23	Nov	DRY	OTC	23.4	610.8
24N	24	Nov	CON	OTC	17.8	623.8
25N	25	Nov	WET	ambient	16.6	530.6
26N	26	Nov	DRY	OTC	21.5	626.8
32N	32	Nov	CON	ambient	18.7	534.5
