# Supplementary material for: Assessing the responses of Sphagnum micro-eukaryotes to climate changes using high throughput sequencing
Source: PeerJ. 2020 Sep 18;8:e9821. doi: 10.7717/peerj.9821 (PMC7505061; doi:10.7717/peerj.9821)
Supplement: Supplemental Information 11 [file peerj-08-9821-s011.xlsx]

## Sheet: Supplementary_4_LME_models_summ
Supplemental Table S3 Summary of linear mixed effect models of diversity indices.
Shannon_diversity
	Linear mixed-effects model fit by maximum likelihood
	Data: diversity_indices
	Log-likelihood: -60.13249
	Fixed: Shannon_diversity ~ WTD + GDD
		(Intercept)	WTD	GDD
		3.26661	-0.0381507	0.00114498
	Random effects:
	Formula: ~1 | Plot
		(Intercept)
	StdDev:	0.0924987
	Formula: ~1 | Season %in% Plot
		(Intercept)	Residual
	StdDev:	0.713783	0.158226
	Number of Observations: 54
	Number of Groups:
	Plot Season %in% Plot
	18 54
Evenness
	Linear mixed-effects model fit by maximum likelihood
	Data: diversity_indices
	Log-likelihood: 33.03684
	Fixed: Evenness ~ WTD + GDD
		(Intercept)	WTD	GDD
		0.574172	-0.00565374	0.000145178
	Random effects:
	Formula: ~1 | Plot
		(Intercept)
	StdDev:	7.12252e-06
	Formula: ~1 | Season %in% Plot
		(Intercept)	Residual
	StdDev:	0.131238	0.000619538
	Number of Observations: 54
	Number of Groups:
	Plot Season %in% Plot
	18 54
Rarefied_OTU_richness
	Linear mixed-effects model fit by maximum likelihood
	Data: diversity_indices
	Log-likelihood: -272.0808
	Fixed: Rarefied_OTU_richness ~ WTD + GDD
		(Intercept)	WTD	GDD
		171.22	-2.62598	0.0926792
	Random effects:
	Formula: ~1 | Plot
		(Intercept)
	StdDev:	11.6936
	Formula: ~1 | Season %in% Plot
		(Intercept)	Residual
	StdDev:	33.8411	11.1155
	Number of Observations: 54
	Number of Groups:
	Plot Season %in% Plot
	18 54
