# Supplementary material for: Assessing the responses of Sphagnum micro-eukaryotes to climate changes using high throughput sequencing
Source: PeerJ. 2020 Sep 18;8:e9821. doi: 10.7717/peerj.9821 (PMC7505061; doi:10.7717/peerj.9821)
Supplement: Supplemental Information 12 [file peerj-08-9821-s012.xlsx]

## Sheet: Sheet1
Supplemental Table S4 Diversity indexes (Shannon diversity, Evenness, OTU richness, Rarefied OTU richness) in each analyzed sample in a field manipulative experiment in a Polish peatland.
	Plot	Season	Treatment	Temperature	Shannon diversity	Evenness	OTU richness	Rarefied OTU richness
2M	2	May	DRY	OTC	2.9795	0.509375	347	141.449
3M	3	May	WET	ambient	3.37264	0.600459	275	160.675
4M	4	May	CON	OTC	0.342839	0.06132	268	36.6624
5M	5	May	DRY	ambient	3.54049	0.583429	432	153.496
7M	7	May	CON	OTC	3.05312	0.573571	205	193.482
8M	8	May	CON	ambient	3.48665	0.606774	313	186.262
10M	10	May	WET	ambient	2.3502	0.423235	258	124.829
12M	12	May	CON	ambient	0.400945	0.071021	283	33.6856
13M	13	May	DRY	ambient	3.64973	0.607645	406	188.966
14M	14	May	WET	OTC	2.93464	0.529597	255	168.772
16M	16	May	WET	OTC	3.52005	0.661897	204	181.266
19M	19	May	WET	OTC	3.45638	0.625088	252	182.48
22M	22	May	DRY	ambient	3.03273	0.539594	276	135.263
23M	23	May	DRY	OTC	3.21488	0.534591	409	137.368
24M	24	May	CON	OTC	2.86485	0.51105	272	138.842
25M	25	May	WET	ambient	3.71874	0.684934	228	193.941
26M	26	May	DRY	OTC	3.50484	0.601891	338	162.282
32M	32	May	CON	ambient	3.70316	0.701606	196	192.022
2A	2	Aug	DRY	OTC	2.87294	0.51351	269	145.841
3A	3	Aug	WET	ambient	1.4553	0.28272	172	96.6142
4A	4	Aug	CON	OTC	1.62163	0.272994	380	87.5576
5A	5	Aug	DRY	ambient	2.56341	0.436539	355	123.862
7A	7	Aug	CON	OTC	2.64185	0.468846	280	136.662
8A	8	Aug	CON	ambient	3.44667	0.613638	275	190.349
10A	10	Aug	WET	ambient	3.40397	0.667463	164	164
12A	12	Aug	CON	ambient	3.10474	0.603839	171	169.767
13A	13	Aug	DRY	ambient	1.85944	0.323956	311	112.09
14A	14	Aug	WET	OTC	2.7313	0.457408	392	146.732
16A	16	Aug	WET	OTC	3.05955	0.566303	222	126.554
19A	19	Aug	WET	OTC	2.33395	0.409915	297	119.184
22A	22	Aug	DRY	ambient	1.06109	0.183071	329	58.1238
23A	23	Aug	DRY	OTC	2.27161	0.371696	451	125.001
24A	24	Aug	CON	OTC	2.19635	0.388323	286	129.95
25A	25	Aug	WET	ambient	2.46728	0.444941	256	131.851
26A	26	Aug	DRY	OTC	2.29053	0.379511	418	119.046
32A	32	Aug	CON	ambient	3.44335	0.580966	375	176.965
2N	2	Nov	DRY	OTC	4.24587	0.678923	520	237.325
3N	3	Nov	WET	ambient	3.8011	0.620398	458	227.555
4N	4	Nov	CON	OTC	3.81369	0.609443	522	207.413
5N	5	Nov	DRY	ambient	3.56463	0.575459	490	200.337
7N	7	Nov	CON	OTC	3.14977	0.522498	415	164.596
8N	8	Nov	CON	ambient	3.23536	0.536057	418	183.258
10N	10	Nov	WET	ambient	3.73183	0.638308	346	200.695
12N	12	Nov	CON	ambient	3.64209	0.601093	428	202.668
13N	13	Nov	DRY	ambient	3.79827	0.632117	407	205.26
14N	14	Nov	WET	OTC	4.1942	0.736635	297	283.865
16N	16	Nov	WET	OTC	2.86124	0.504946	289	175.717
19N	19	Nov	WET	OTC	3.43647	0.577243	385	180.753
22N	22	Nov	DRY	ambient	3.06239	0.509234	409	160.002
23N	23	Nov	DRY	OTC	3.90479	0.64723	417	230.827
24N	24	Nov	CON	OTC	3.8428	0.633486	431	211.633
25N	25	Nov	WET	ambient	3.08013	0.53784	307	164.239
26N	26	Nov	DRY	OTC	3.5183	0.579111	435	211.175
32N	32	Nov	CON	ambient	3.86839	0.65065	382	232.606
