# Supplementary material for: Assessing the responses of Sphagnum micro-eukaryotes to climate changes using high throughput sequencing
Source: PeerJ. 2020 Sep 18;8:e9821. doi: 10.7717/peerj.9821 (PMC7505061; doi:10.7717/peerj.9821)
Supplement: Supplemental Information 13 — P-value indicates the probability to have a higher IndVal by chance. [file peerj-08-9821-s013.xlsx]

## Sheet: Indicators
Supplemental Table S5 Micro-eukaryote indicator OTUs and corresponding taxonomic assignation of all indicators identified in the IndVal analysis with each treatment as a separate group in the field manipulative experiment in a Polish peatland. P-value indicates the probability to have a higher IndVal by chance.
	Treatment	OTU code	Indicator value	P-value	Taxonomic assignation
1	CON	X1092	0.577	0.003	Opisthokonta|Agaricomycotina|Neurospora tetrasperma
2	CON	X1238	0.488	0.036	Rhizaria|Limnofilida|Limnofilidae sp.
3	CON	X1208	0.471	0.024	Alveolata|Dinophyceae|Dinophyceae
4	DRY	X77	0.963	0.001	Opisthokonta|Agaricomycotina|Psilocybe montana
5	DRY	X43	0.957	0.019	Opisthokonta|Pezizomycotina|Physconia perisidiosa
6	DRY	X104	0.941	0.001	Archaeplastida|Trebouxiophyceae|Elliptochloris bilobata
7	DRY	X118	0.933	0.001	Archaeplastida|Microthamniales|Myrmecia sp.
8	DRY	X100	0.916	0.001	Archaeplastida|Trebouxiophyceae|Pseudococcomyxa simplex
9	DRY	X64	0.896	0.017	Opisthokonta|Agaricomycotina|Agaricomycetes
10	DRY	X227	0.887	0.001	Alveolata|Colpodida|Bryophrya gemmea
11	DRY	X115	0.864	0.002	Archaeplastida|Trebouxiophyceae|Botryococcus braunii
12	DRY	X250	0.84	0.002	Archaeplastida|Trebouxiophyceae|Elliptochloris bilobata
13	DRY	X180	0.827	0.004	Opisthokonta|Agaricomycotina|Bullera sp.
14	DRY	X239	0.818	0.001	Archaeplastida|Prasiolales|Chlorella mirabilis
15	DRY	X124	0.805	0.003	Alveolata|Platyophryida|Platyophrya vorax
16	DRY	X267	0.794	0.001	Archaeplastida|Chlorellales|Oocystis sp.
17	DRY	X311	0.791	0.002	Archaeplastida|Watanabea-Clade|Pseudochlorella sp.
18	DRY	X281	0.784	0.001	Archaeplastida|Prasiolales|Diplosphaera chodati
19	DRY	X384	0.775	0.001	Archaeplastida|Chlorellales|Marvania sp.
20	DRY	X94	0.772	0.003	Rhizaria|Cercomonadida|Cercomonas alexieffi
21	DRY	X265	0.76	0.003	Opisthokonta|Agaricomycotina|Tremella polyporina
22	DRY	X594	0.76	0.001	Opisthokonta|Pucciniomycotina|Sporobolomyces pyrrosiae
23	DRY	X101	0.756	0.01	Alveolata|Scuticociliatia|Boveria subcylindrica
24	DRY	X452	0.753	0.001	Alveolata|Colpodida|Bryophrya gemmea
25	DRY	X275	0.737	0.002	Alveolata|Colpodida|Pseudoplatyophrya nana
26	DRY	X215	0.716	0.014	Rhizaria|Spongomonadida|Spongomonas minima
27	DRY	X213	0.715	0.002	Opisthokonta|Pezizomycotina|Protoblastenia rupestris
28	DRY	X532	0.715	0.001	Archaeplastida|Chlorellales|Nannochloris sp.
29	DRY	X444	0.703	0.007	Archaeplastida|Chlorophyceae|Aphanochaete sp.
30	DRY	X326	0.689	0.01	Rhizaria|Cercomonadida|Eocercomonas echina
31	DRY	X298	0.678	0.002	Alveolata|Platyophryida|Platyophrya vorax
32	DRY	X387	0.677	0.001	Opisthokonta|Cryptomycotina|CryptomycotinaX sp.
33	DRY	X557	0.667	0.002	Opisthokonta|Pezizomycotina|Eurotiomycetes sp.
34	DRY	X556	0.655	0.004	Opisthokonta|Pucciniomycotina|Sporobolomyces lophatheri
35	DRY	X189	0.646	0.019	Opisthokonta|Agaricomycotina|Cryptococcus huempii
36	DRY	X516	0.641	0.007	Opisthokonta|Pezizomycotina|Eurotiomycetes
37	DRY	X492	0.63	0.01	Archaeplastida|Trebouxiophyceae|Pseudococcomyxa simplex
38	DRY	X568	0.614	0.007	Alveolata|Nassophorea|Nassula sp.
39	DRY	X536	0.607	0.021	Rhizaria|Cryomonadida|Rhogostoma schuessleri
40	DRY	X809	0.605	0.002	Rhizaria|Glissomonadida|Proleptomonas faecicola
41	DRY	X187	0.598	0.048	Rhizaria|Glissomonadida|Group_Te sp.
42	DRY	X376	0.593	0.026	Opisthokonta|Chytridiomycotina|Chytridiomycotina
43	DRY	X669	0.593	0.005	Rhizaria|Cercomonadida|Cercomonas alexieffi
44	DRY	X381	0.593	0.027	Opisthokonta|Mucoromycotina|Mortierella alpina
45	DRY	X756	0.59	0.003	Archaeplastida|Chlorellales|Coenocystis inconstans
46	DRY	X636	0.588	0.032	Alveolata|Hypotrichia|Pattersoniella vitiphila
47	DRY	X490	0.586	0.05	Rhizaria|Glissomonadida|Proleptomonas faecicola
48	DRY	X645	0.586	0.032	Alveolata|Colpodida|Pseudoplatyophrya nana
49	DRY	X707	0.58	0.011	Opisthokonta|Pezizomycotina|Ochroconis gallopava
50	DRY	X618	0.577	0.007	Rhizaria|Glissomonadida|Proleptomonas faecicola
51	DRY	X498	0.576	0.02	Alveolata|Colpodida|Bryophrya gemmea
52	DRY	X268	0.575	0.011	Alveolata|Dinophyceae|Luciella sp.
53	DRY	X292	0.574	0.011	Alveolata|Haptoria|Arcuospathidium sp.
54	DRY	X688	0.573	0.019	Rhizaria|Glissomonadida|Group_Te sp.
55	DRY	X757	0.565	0.007	Alveolata|Piroplasmida|Theileria velifera
56	DRY	X711	0.564	0.011	Opisthokonta|Pezizomycotina|Acarospora smaragdula_var._lesdainii
57	DRY	X583	0.558	0.008	Alveolata|Platyophryida|Etoschophrya inornata
58	DRY	X449	0.555	0.015	Alveolata|Colpodida|Bresslaua vorax
59	DRY	X491	0.553	0.031	Stramenopiles|MH-XII|MH-XII
60	DRY	X770	0.544	0.011	Alveolata|Scuticociliatia|Boveria subcylindrica
61	DRY	X850	0.544	0.028	Opisthokonta|Pezizomycotina|Eurotiomycetes
62	DRY	X819	0.54	0.007	Hacrobia|Cryptophyceae|Goniomonas sp.
63	DRY	X1113	0.54	0.015	Archaeplastida|Zygnemophyceae|Penium margaritaceum
64	DRY	X470	0.527	0.01	Stramenopiles|MAST-19|MAST-19 sp.
65	DRY	X773	0.527	0.015	Alveolata|Platyophryida|Platyophrya vorax
66	DRY	X806	0.527	0.009	Rhizaria|Spongomonadida|Spongomonas minima
67	DRY	X1039	0.527	0.011	Opisthokonta|Agaricomycotina|Bullera sp.
68	DRY	X1247	0.527	0.007	Opisthokonta|Cryptomycotina|Cryptomycotina
69	DRY	X1524	0.527	0.011	Alveolata|Dinophyceae|Dinophyceae sp.
70	DRY	X715	0.525	0.049	Alveolata|Dinophyceae|Dinophyceae sp.
71	DRY	X364	0.523	0.038	Opisthokonta|Cryptomycotina|Cryptomycotina
72	DRY	X919	0.519	0.014	Opisthokonta|Pucciniomycotina|Erythrobasidium clade
73	DRY	X847	0.516	0.014	Alveolata|Dinophyceae|Dinophyceae sp.
74	DRY	X865	0.516	0.02	Opisthokonta|Pucciniomycotina|Rhodotorula yarrowii
75	DRY	X1009	0.516	0.005	Alveolata|Dinophyceae|Dinophyceae
76	DRY	X494	0.511	0.028	Opisthokonta|Agaricomycotina|Lepiota cristata
77	DRY	X986	0.503	0.021	Opisthokonta|Ichthyosphonida|Anurofeca sp.
78	DRY	X576	0.502	0.048	Archaeplastida|Trebouxiophyceae|Elliptochloris bilobata
79	DRY	X1031	0.5	0.02	Opisthokonta|Agaricomycotina|Tremella polyporina
80	DRY	X1054	0.5	0.042	Archaeplastida|Watanabea-Clade|Viridiella fridericiana
81	DRY	X1049	0.497	0.028	Alveolata|Colpodida|Pseudoplatyophrya nana
82	DRY	X1116	0.493	0.032	Archaeplastida|Trebouxiophyceae|Elliptochloris bilobata
83	DRY	X1117	0.493	0.023	Archaeplastida|Watanabea-Clade|Chlorella trebouxioides
84	DRY	X982	0.492	0.041	Opisthokonta|Agaricomycotina|Rhizoctonia sp.
85	DRY	X727	0.488	0.031	Rhizaria|Spongomonadida|Spongomonas minima
86	DRY	X1320	0.481	0.037	Archaeplastida|Trebouxiophyceae|Elliptochloris bilobata
87	DRY	X1379	0.481	0.042	Rhizaria|Ventricleftida|Ventricleftida
88	DRY	X817	0.479	0.032	Alveolata|Dinophyceae|Cochlodinium polykrikoides
89	DRY	X984	0.477	0.022	Archaeplastida|Trebouxiophyceae|Botryococcus braunii
90	DRY	X903	0.475	0.042	Archaeplastida|Trebouxiophyceae|Choricystis sp.
91	DRY	X606	0.471	0.031	Opisthokonta|Pezizomycotina|Leohumicola verrucosa
92	DRY	X818	0.471	0.035	Hacrobia|Cryptophyceae|Goniomonas sp.
93	DRY	X1085	0.471	0.027	Opisthokonta|Saccharomycotina|Saccharomycetales
94	DRY	X1231	0.471	0.028	Excavata|Heterolobosea|Vahlkampfiidae
95	DRY	X1492	0.471	0.028	Opisthokonta|Pezizomycotina|Neocudoniella radicella
96	DRY	X1565	0.471	0.025	Archaeplastida|Trebouxiophyceae|Pseudococcomyxa simplex
97	DRY	X1567	0.471	0.024	Archaeplastida|Prasiolales|Pseudochlorella pringsheimii
98	DRY	X1698	0.471	0.031	Rhizaria|Glissomonadida|Proleptomonas faecicola
99	DRY	X940	0.451	0.022	Alveolata|Peniculia|Lembadion bullinum
100	WET	X543	0.645	0.002	Archaeplastida|Trebouxiophyceae|Botryococcus braunii
101	WET	X902	0.637	0.002	Alveolata|Scuticociliatia|Boveria subcylindrica
102	WET	X440	0.598	0.004	Stramenopiles|Chrysophyceae-Synurophyceae|Clade-C
103	WET	X191	0.573	0.026	Opisthokonta|Agaricomycotina|Squamanita paradoxa
104	WET	X246	0.547	0.014	Rhizaria|Cercomonadida|Paracercomonas crassicauda
105	WET	X842	0.527	0.007	Stramenopiles|Chrysophyceae-Synurophyceae|Chrysophyceae sp.
106	WET	X1169	0.527	0.005	Opisthokonta|Pezizomycotina|Articulospora tetracladia
107	WET	X1048	0.497	0.029	Amoebozoa|Himatismenida|Cochliopodium larifeili
108	WET	X753	0.486	0.043	Rhizaria|Pansomonadida|Aurigamonas solis
109	WET	X550	0.481	0.034	Stramenopiles|Chrysophyceae-Synurophyceae|Oikomonas sp.
110	CON+DRY	X33	0.992	0.001	Archaeplastida|Trebouxiophyceae|Pseudococcomyxa simplex
111	CON+DRY	X103	0.964	0.001	Archaeplastida|Watanabea-Clade|Watanabea reniformis
112	CON+DRY	X34	0.948	0.005	Opisthokonta|Pezizomycotina|Scolecobasidium sp.
113	CON+DRY	X82	0.942	0.026	Archaeplastida|Chlorellales|Lobosphaera tirolensis
114	CON+DRY	X63	0.942	0.002	Archaeplastida|Chlorophyceae|Kirchneriella aperta
115	CON+DRY	X199	0.907	0.001	Archaeplastida|Trebouxiophyceae|Coccomyxa solorinae-saccatae
116	CON+DRY	X138	0.881	0.004	Alveolata|Platyophryida|Platyophrya vorax
117	CON+DRY	X40	0.856	0.002	Alveolata|Peniculia|Lembadion bullinum
118	CON+DRY	X108	0.855	0.002	Alveolata|Dinophyceae|Dinophyceae
119	CON+DRY	X243	0.851	0.003	Opisthokonta|Agaricomycotina|Rhizoctonia solani
120	CON+DRY	X151	0.839	0.001	Archaeplastida|Trebouxiophyceae|Elliptochloris bilobata
121	CON+DRY	X181	0.823	0.001	Rhizaria|Cercomonadida|Cercomonas celer
122	CON+DRY	X194	0.807	0.002	Opisthokonta|Pezizomycotina|Physconia perisidiosa
123	CON+DRY	X169	0.761	0.01	Opisthokonta|Acanthoecida|Stephanoecidae_Group_E
124	CON+DRY	X137	0.744	0.003	Alveolata|Dino-Group-II|Dino-Group-II-Clade-6
125	CON+DRY	X342	0.739	0.026	Alveolata|Dinophyceae|Dinophyceae
126	CON+DRY	X379	0.738	0.013	Rhizaria|Glissomonadida|Bodomorpha minima
127	CON+DRY	X241	0.737	0.015	Rhizaria|Glissomonadida|Proleptomonas faecicola
128	CON+DRY	X233	0.725	0.003	Opisthokonta|Cryptomycotina|Cryptomycotina
129	CON+DRY	X283	0.707	0.001	Rhizaria|Filosa-Sarcomonadea|Filosa-Sarcomonadea
130	CON+DRY	X270	0.706	0.036	Excavata|Heterolobosea|Vahlkampfiidae
131	CON+DRY	X198	0.701	0.013	Stramenopiles|Eustigmatophyceae|Goniochloris sculpta
132	CON+DRY	X182	0.693	0.05	Stramenopiles|Oomyceta|Achlya bisexualis
133	CON+DRY	X483	0.692	0.014	Alveolata|Platyophryida|Platyophrya vorax
134	CON+DRY	X475	0.68	0.01	Archaeplastida|Chlorophyceae|Kirchneriella aperta
135	CON+DRY	X485	0.679	0.044	Archaeplastida|Trebouxiophyceae|Coccomyxa sp.
136	CON+DRY	X163	0.664	0.021	Alveolata|Colpodida|Colpoda sp.
137	CON+DRY	X446	0.624	0.011	Alveolata|Trichostomatia|Balantidium coli
138	CON+DRY	X499	0.624	0.018	Archaeplastida|Chlorellales|Oocystis sp.
139	CON+DRY	X282	0.621	0.04	Opisthokonta|Pezizomycotina|Physconia perisidiosa
140	CON+DRY	X262	0.599	0.046	Alveolata|Colpodida|Exocolpoda augustini
141	CON+DRY	X627	0.59	0.045	Opisthokonta|Pucciniomycotina|Sporobolomyces pyrrosiae
142	CON+DRY	X523	0.57	0.046	Opisthokonta|Pezizomycotina|Neocudoniella radicella
143	CON+DRY	X628	0.553	0.029	Opisthokonta|Agaricomycotina|Bullera taiwanensis
144	CON+WET	X192	0.941	0.001	Rhizaria|Pansomonadida|Aurigamonas solis
145	CON+WET	X84	0.811	0.021	Rhizaria|Pansomonadida|Aurigamonas solis
146	CON+WET	X276	0.792	0.002	Alveolata|Scuticociliatia|Boveria subcylindrica
147	CON+WET	X156	0.744	0.003	Stramenopiles|Chrysophyceae-Synurophyceae|Chrysophyceae-Synurophyceae
148	CON+WET	X433	0.705	0.011	Alveolata|Scuticociliatia|Boveria subcylindrica
149	CON+WET	X346	0.673	0.033	Stramenopiles|Chrysophyceae-Synurophyceae|Chrysamoeba pyrenoidifera
150	CON+WET	X736	0.601	0.011	Opisthokonta|Pezizomycotina|Meliniomyces variabilis
151	CON+WET	X356	0.598	0.035	Stramenopiles|Synurales|Mallomonas papillosa
152	CON+WET	X455	0.577	0.013	Rhizaria|Glissomonadida|Clade_N/F-A sp.
153	CON+WET	X755	0.553	0.021	Opisthokonta|Ustilaginomycotina|Rhodotorula bacarum
