# Supplementary material for: Assessing the responses of Sphagnum micro-eukaryotes to climate changes using high throughput sequencing
Source: PeerJ. 2020 Sep 18;8:e9821. doi: 10.7717/peerj.9821 (PMC7505061; doi:10.7717/peerj.9821)
Supplement: Supplemental Information 14 — P-value indicate the probability to have a higher IndVal by chance. [file peerj-08-9821-s014.xlsx]

## Sheet: Sheet1
Supplemental Table S6 Micro-eukaryote indicator OTUs and corresponding taxonomic assignation of all indicators identified in the IndVal analysis with OTC vs ambient as separate groups in the field manipulative experiment in a Polish peatland. P-value indicate the probability to have a higher IndVal by chance.
Treatment	OTU code	Taxonomic assignation		Indicator value	P-value
ambient	X459	Alveolata	Colpodea	0.569	0.012
ambient	X229	Archaeplastida	Chlorophyceae	0.67	0.021
ambient	X445		Trebouxiophyceae	0.614	0.024
ambient	X1287		Trebouxiophyceae	0.48	0.048
OTC	X380		Chlorophyceae	0.758	0.009
OTC	X267		Trebouxiophyceae	0.646	0.042
OTC	X1145	Discosea	Heterolobosea	0.476	0.043
ambient	X233	Opisthokonta	Cryptomycotina	0.661	0.015
ambient	X890		Basidiomycota	0.556	0.014
ambient	X254		Basidiomycota	0.504	0.035
ambient	X291		Ascomycota	0.469	0.05
OTC	X296		Ascomycota	0.657	0.015
OTC	X173		Mucoromycotina	0.655	0.014
OTC	X335		Mucoromycotina	0.632	0.015
OTC	X423		Basidiomycota	0.543	0.046
OTC	X706		Basidiomycota	0.537	0.027
OTC	X670		Ascomycota	0.536	0.047
OTC	X639		Mucoromycotina	0.529	0.032
OTC	X458		Ascomycota	0.528	0.031
OTC	X711		Ascomycota	0.519	0.023
OTC	X766		Ascomycota	0.482	0.038
OTC	X703		Basidiomycota	0.461	0.039
ambient	X1030	Rhizaria	Cryomonadida	0.487	0.033
OTC	X336		Cercomonadida	0.585	0.037
OTC	X1371		Pansomonadida	0.43	0.048
OTC	X315	Stramenopiles	Peronosporales	0.529	0.029
OTC	X935		Peronosporales	0.495	0.031
