# Supplementary material for: Assessing the responses of Sphagnum micro-eukaryotes to climate changes using high throughput sequencing
Source: PeerJ journal article supplement (doi:10.7717/peerj.9821), 2020-09-18

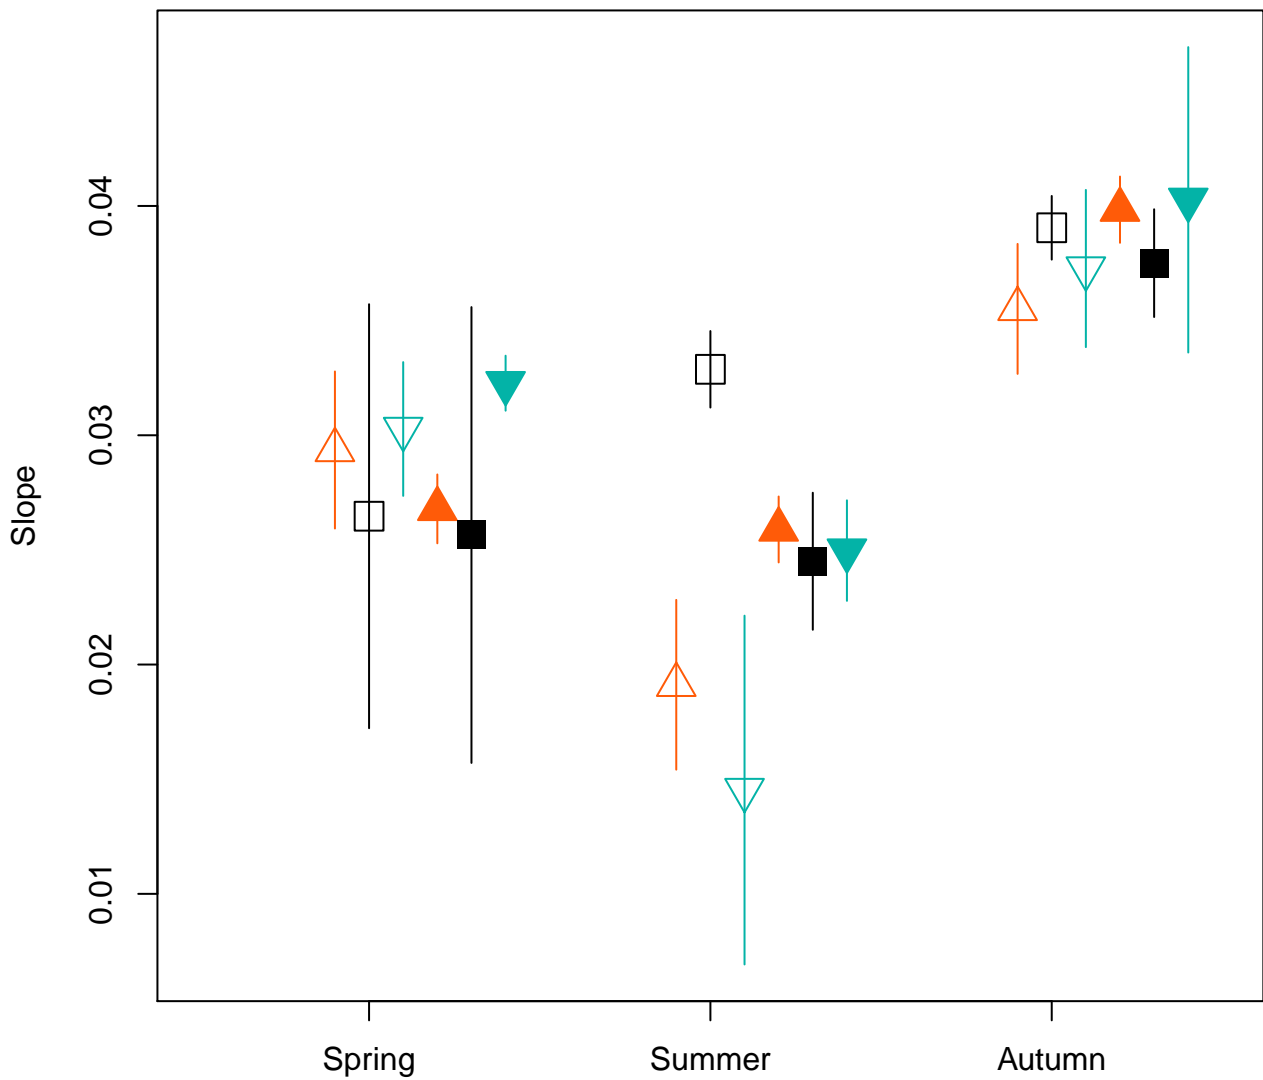

Supplement: Supplemental_figure_S3_v2_Lineplots_of_the_rarefaction_curves_slopes.pdf [file Supplemental_figure_S3_v2_Lineplots_of_the_rarefaction_curves_slopes.pdf]
